# Supplementary material for: Development of TaqMan probes targeting the four major celiac disease epitopes found in α-gliadin sequences of spelt (Triticum aestivum ssp. spelta) and bread wheat (Triticum aestivum ssp. aestivum)
Source: PubMed Central journal article supplement (PMC5588674; doi:10.1186/s13007-017-0222-2), 2017-09-06

**Additional file 2. Melting curve analyses carried out after measurement by qPCR of the global amount of expressed  $\alpha$ -gliadin sequences in 11 spelt (BEL08, DK01, SPA03, BUL04, GER11, GER12, TAD06, SWI23, US06, Iran77d and IRA03) and three diploid (LB01, TR08 and TR10) accessions representative of the ancestral genomes of spelt and bread wheat.**

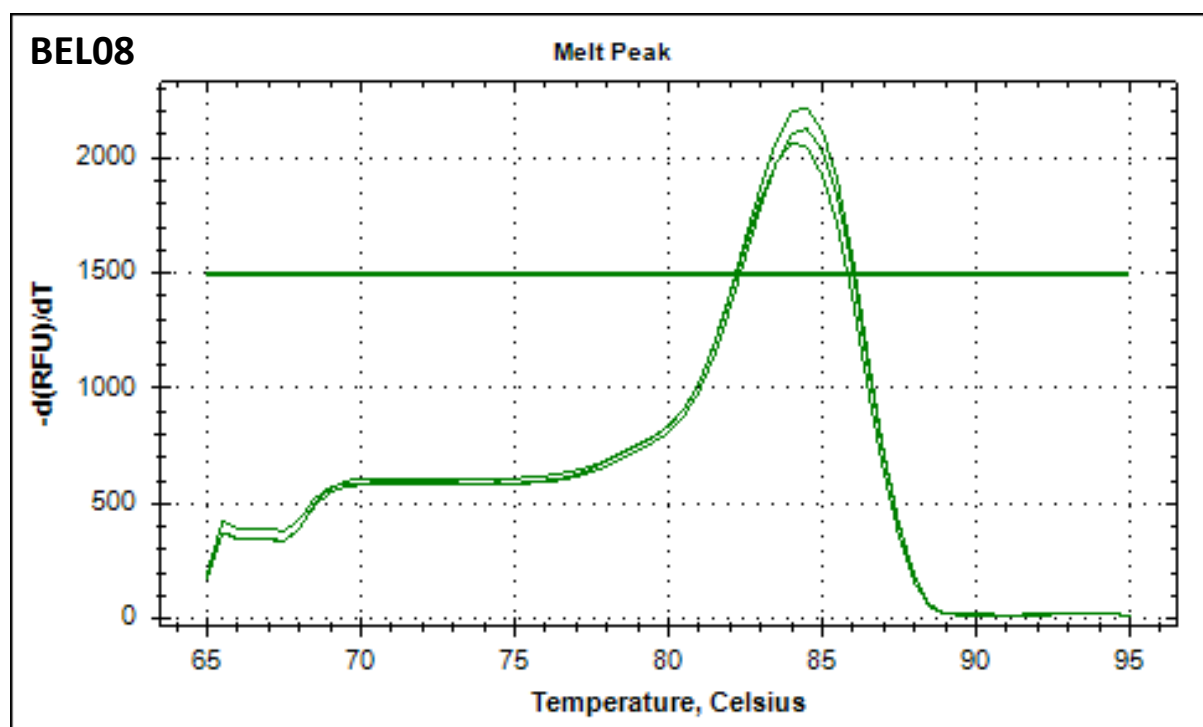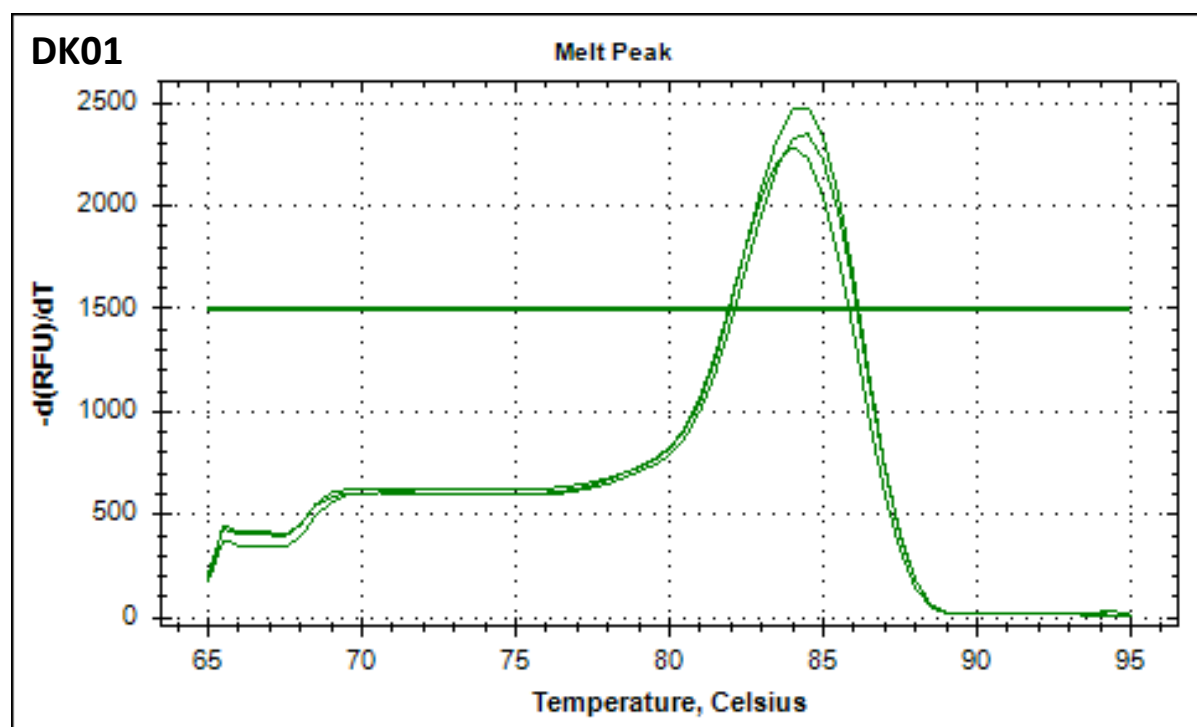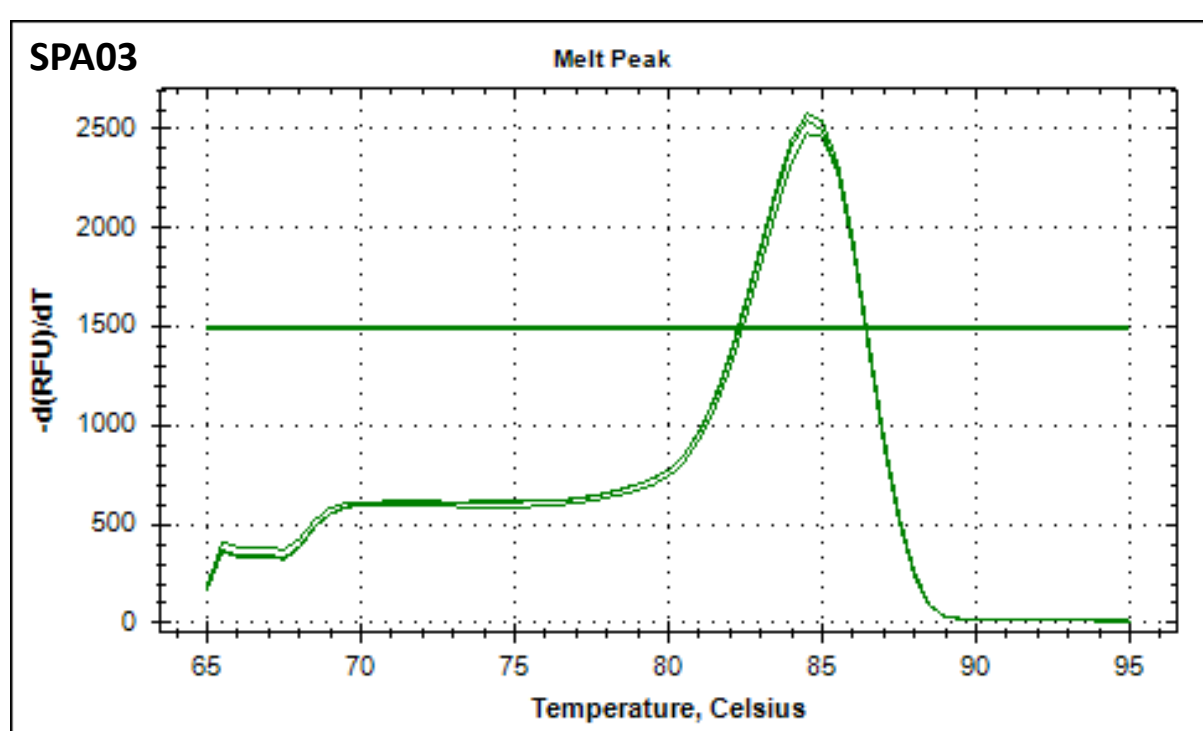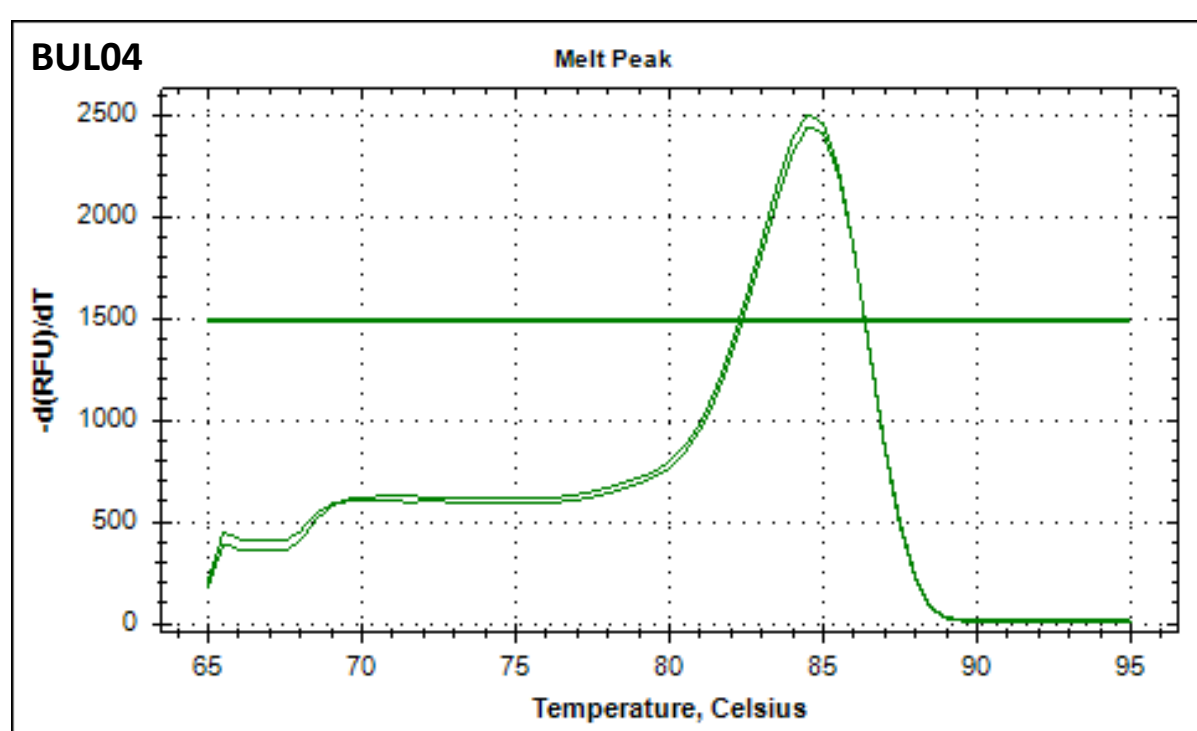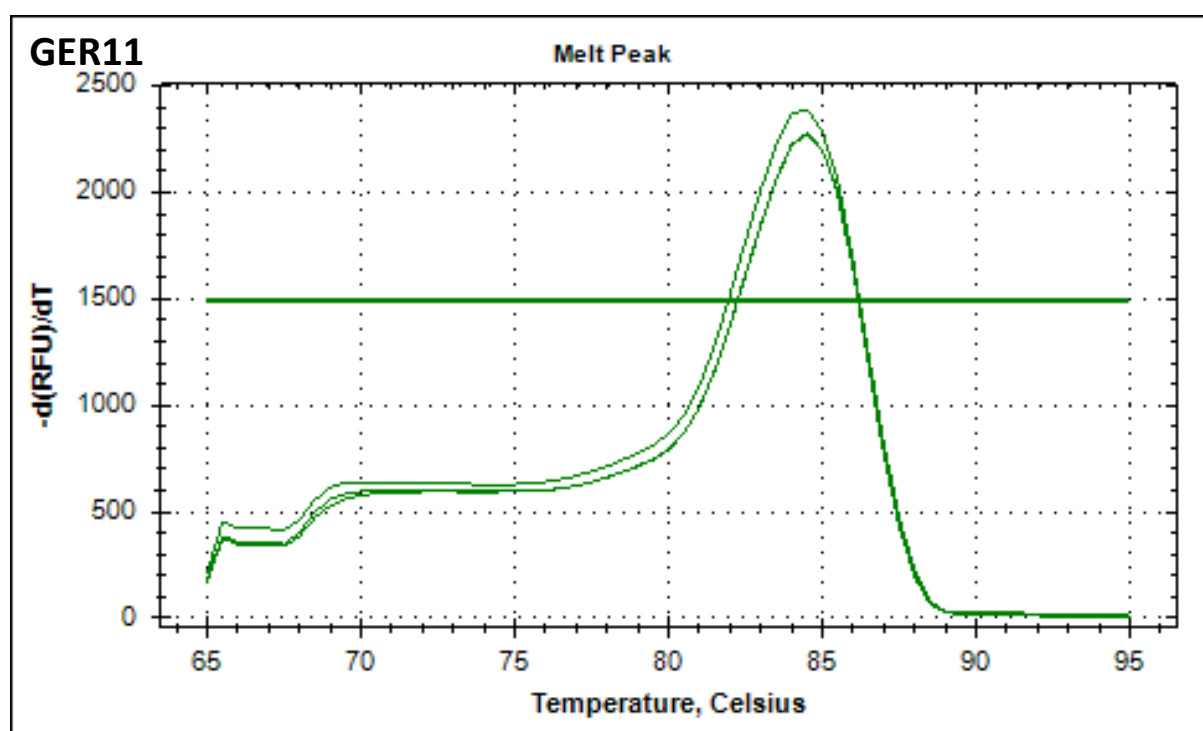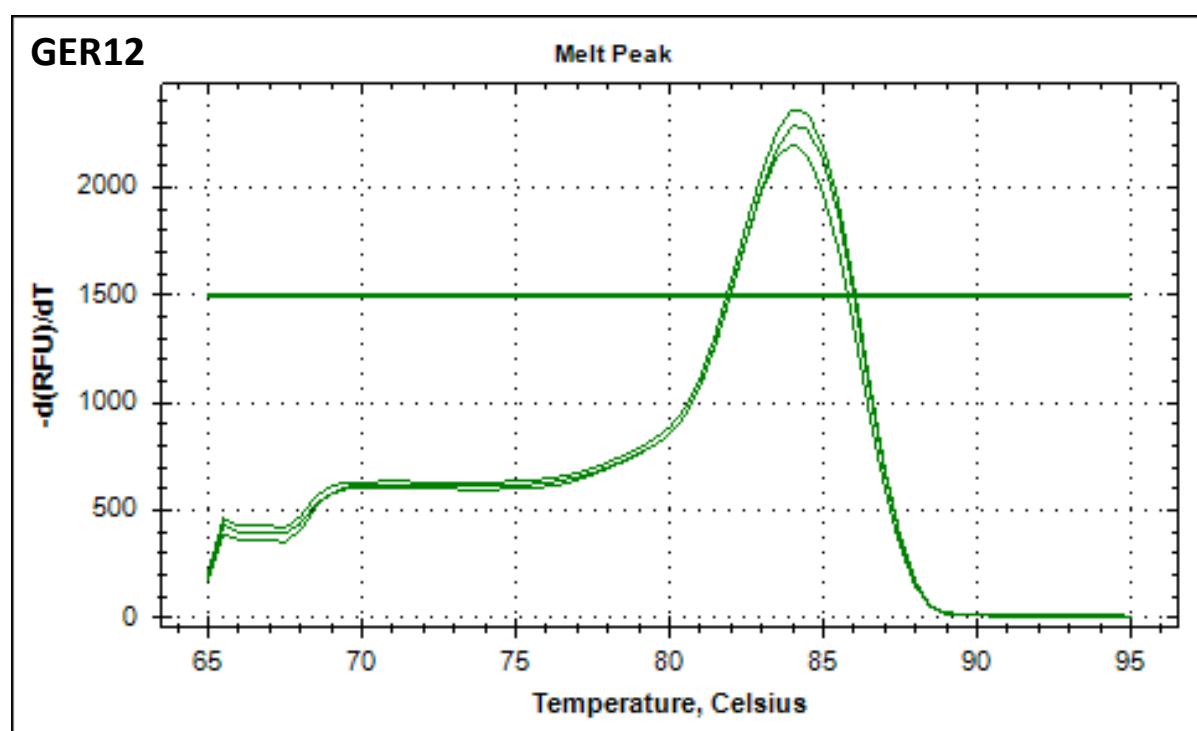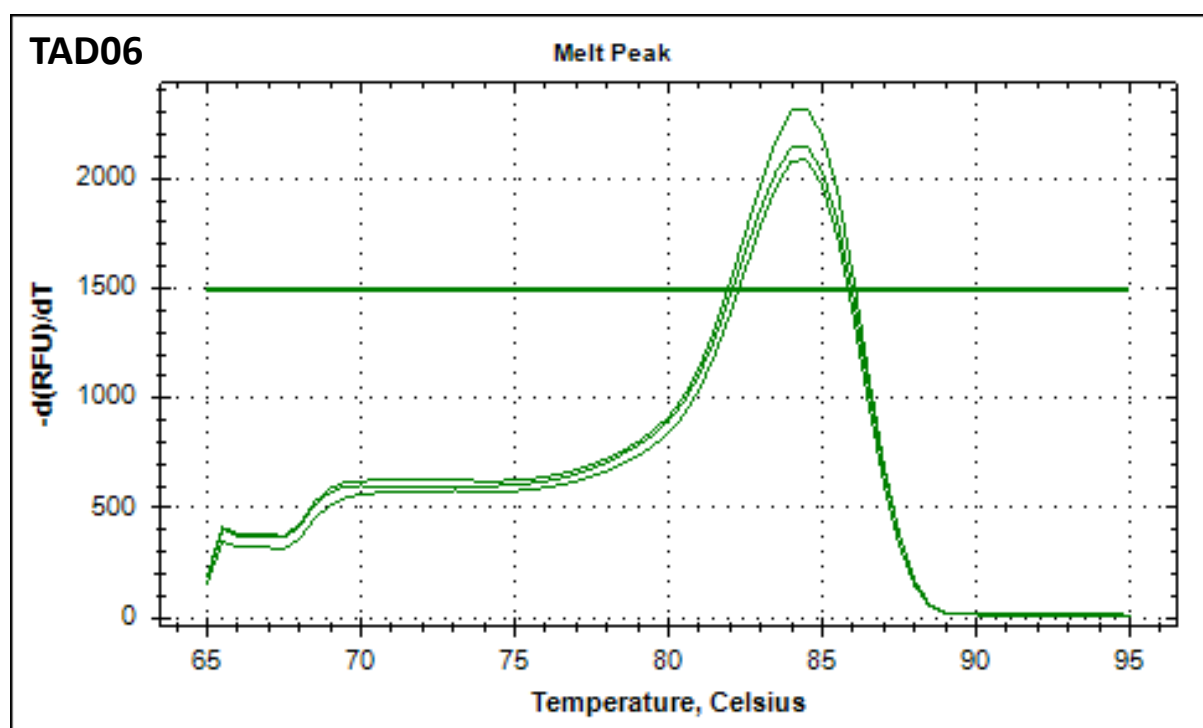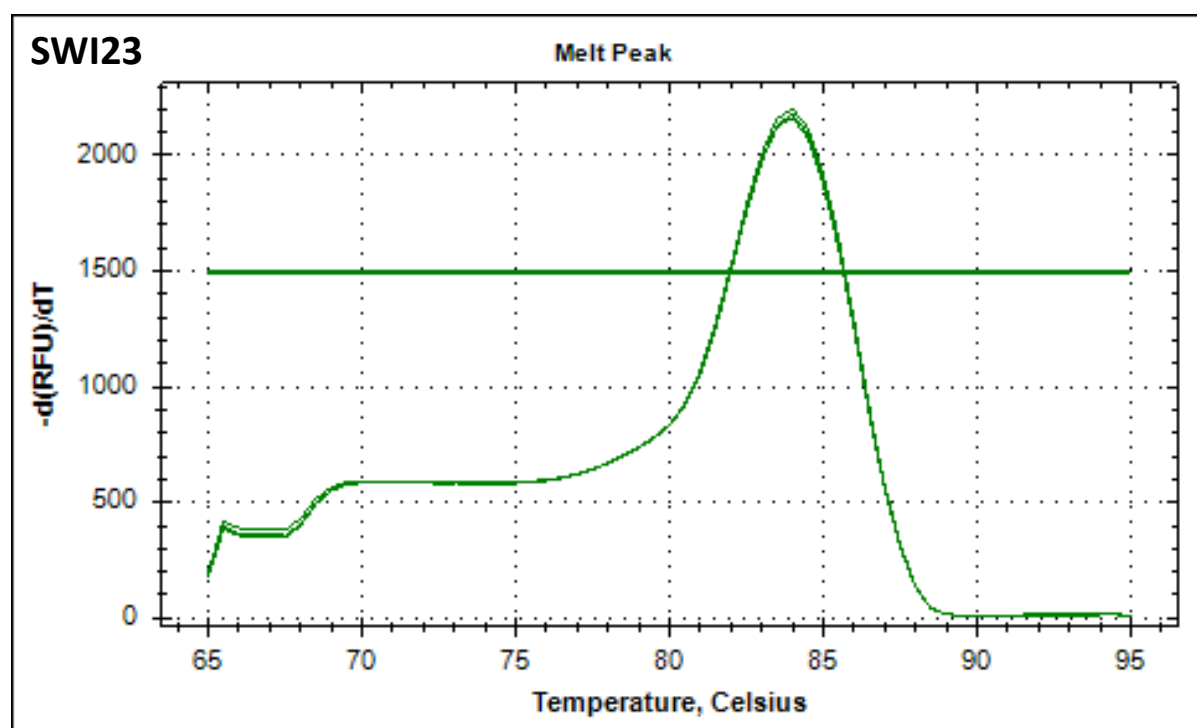

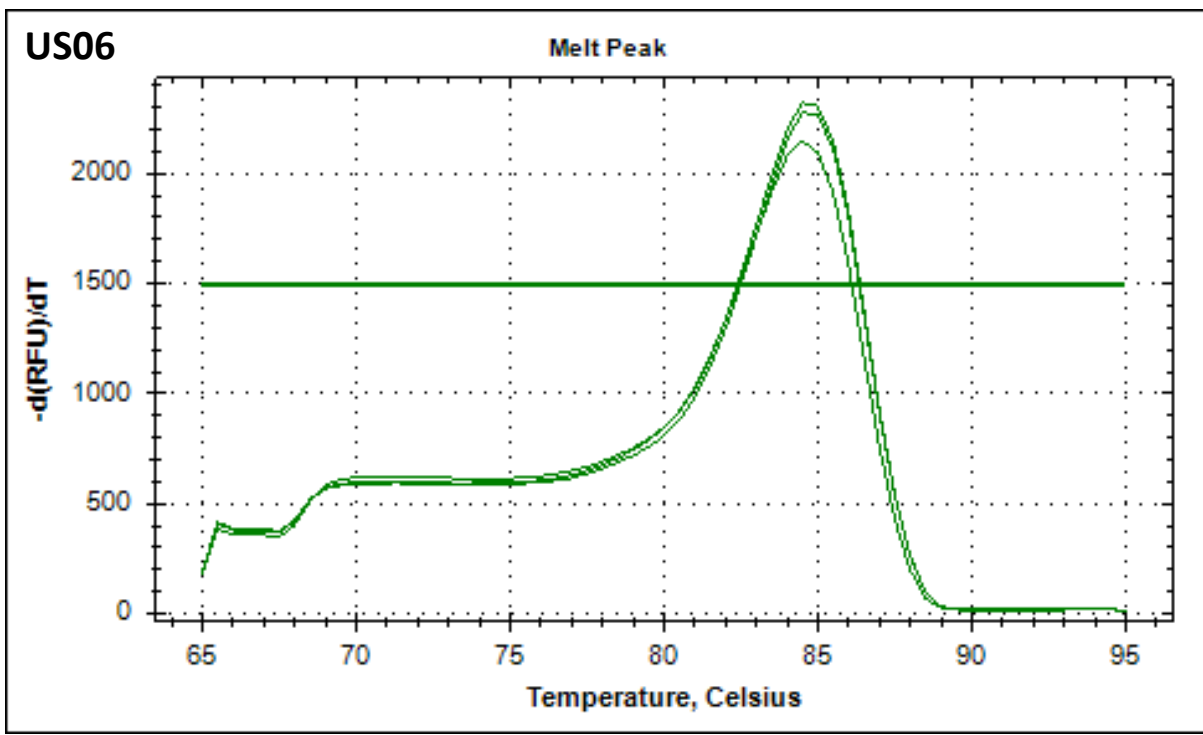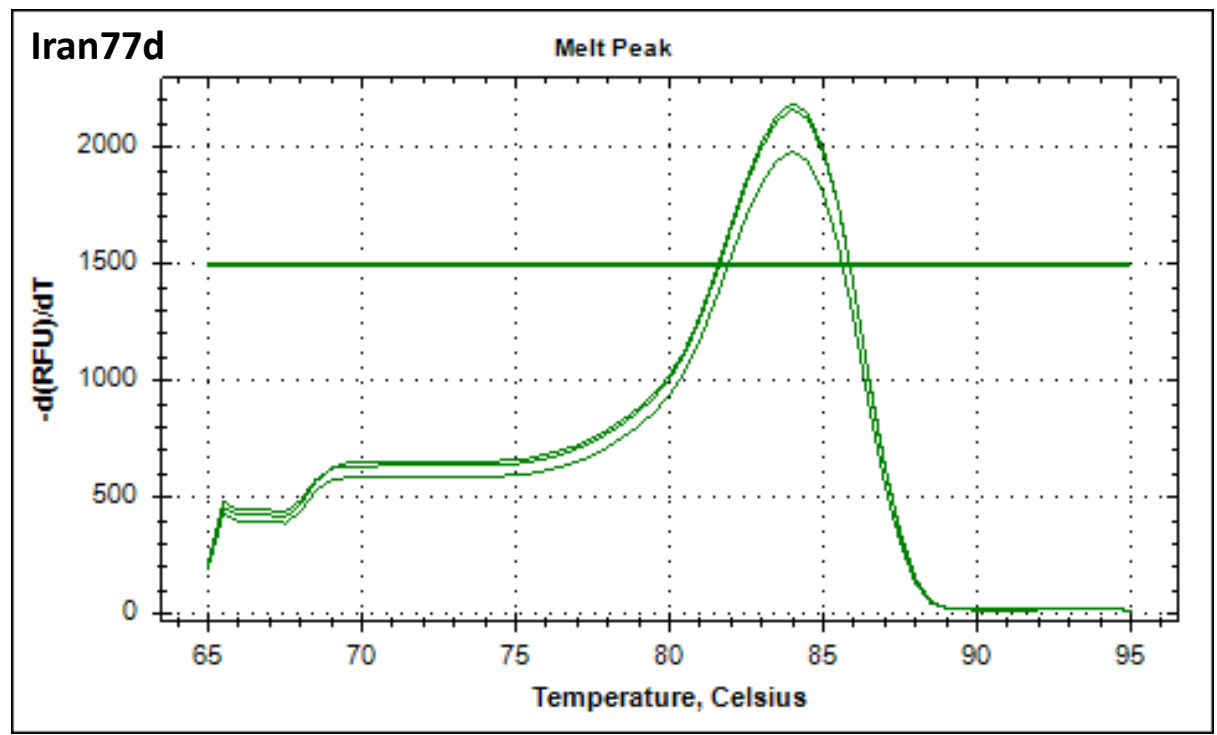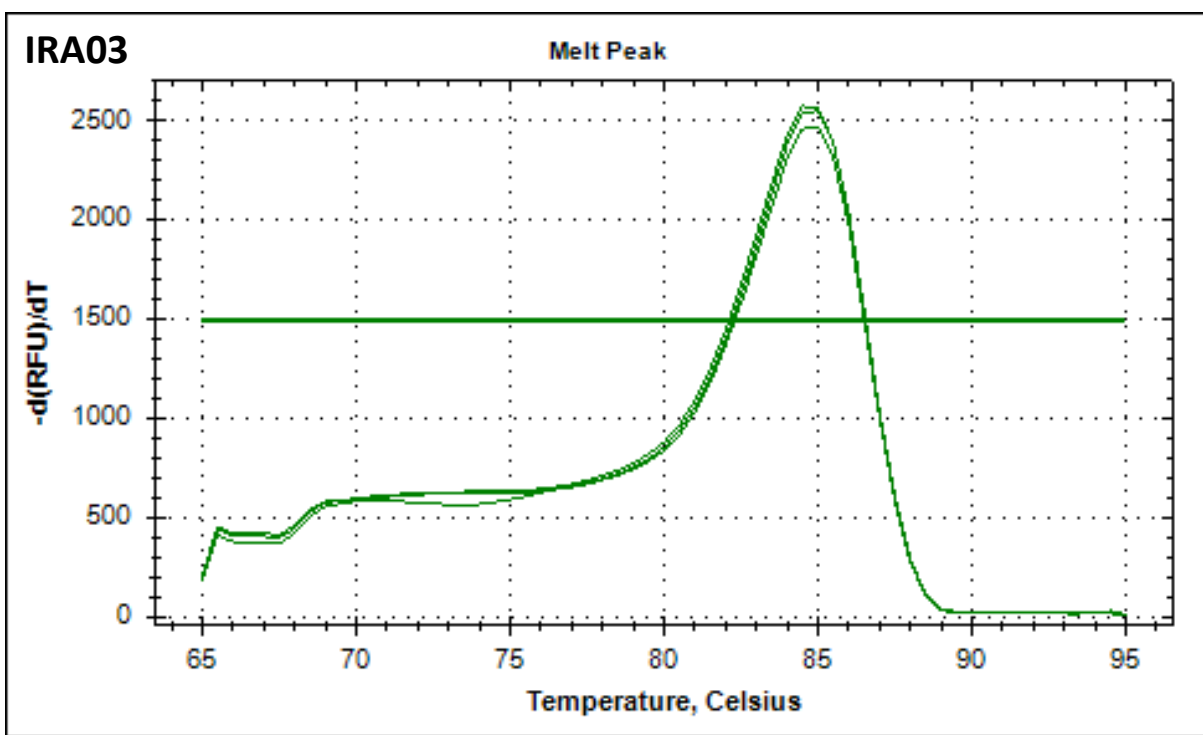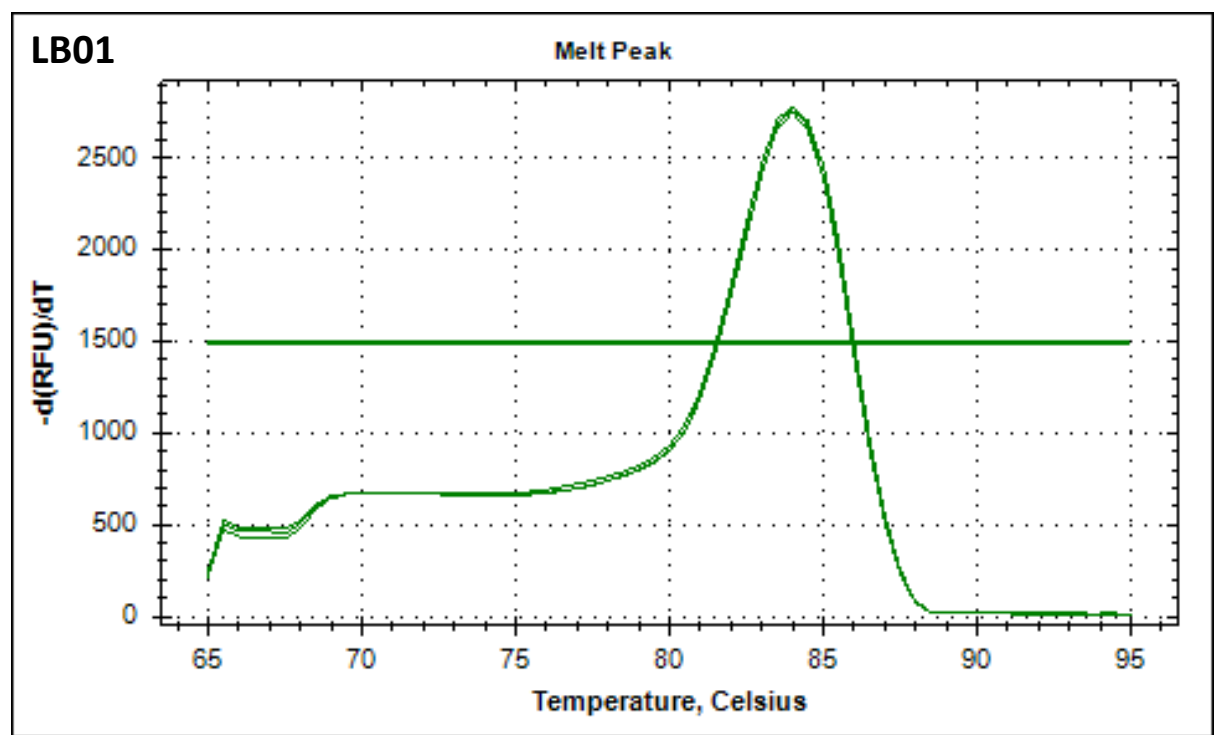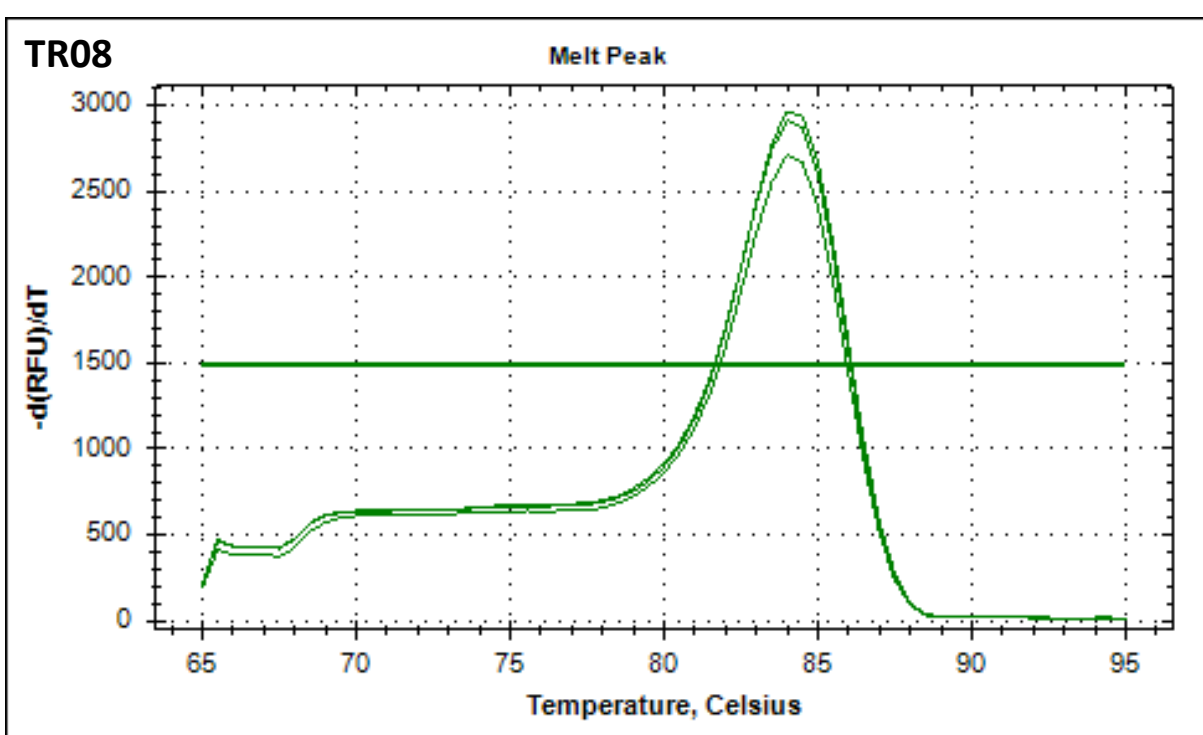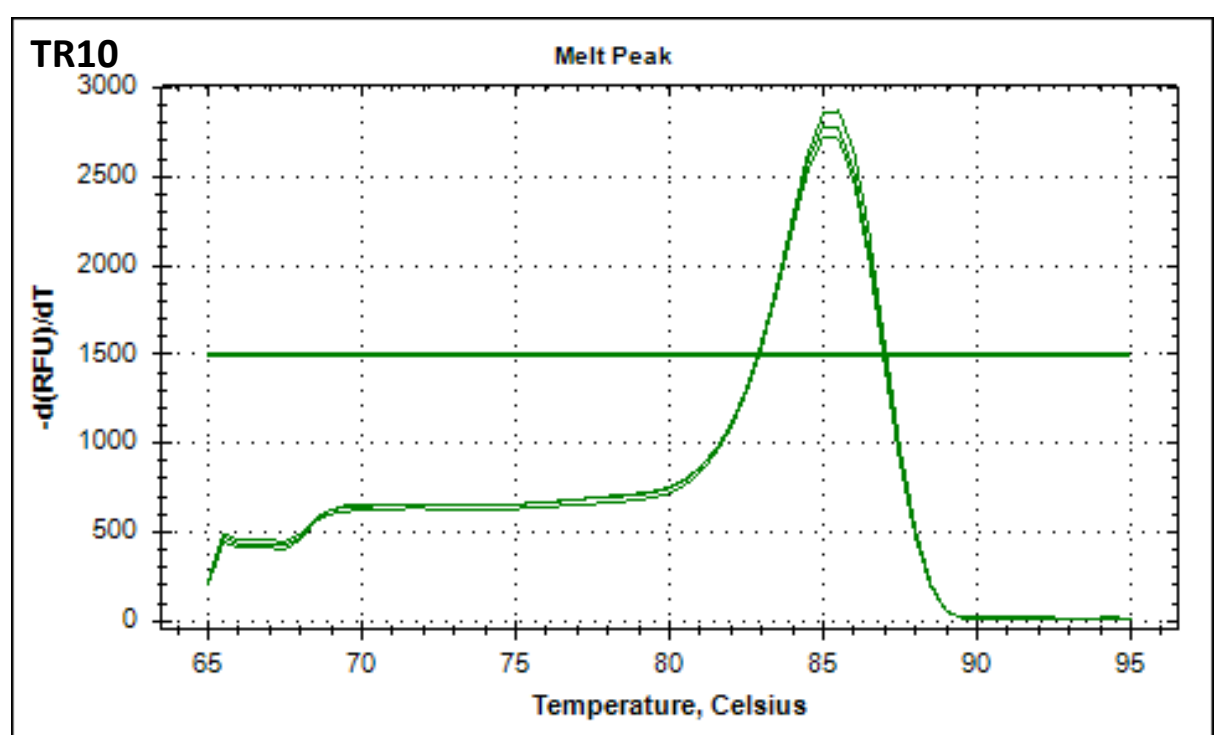

Supplement: 13007_2017_222_MOESM2_ESM.pdf [file 13007_2017_222_MOESM2_ESM.pdf]
