# Supplementary material for: Development of TaqMan probes targeting the four major celiac disease epitopes found in α-gliadin sequences of spelt (Triticum aestivum ssp. spelta) and bread wheat (Triticum aestivum ssp. aestivum)
Source: PubMed Central journal article supplement (PMC5588674; doi:10.1186/s13007-017-0222-2), 2017-09-06
Supplement: 13007_2017_222_MOESM1_ESM.pdf [file 13007_2017_222_MOESM1_ESM.pdf]

**Additional file 1. Composition of the canonical form and the allelic variants of the four  $\alpha$ -gliadin T-cell stimulatory epitopes used to optimize each TaqMan probe's specificity.**

| Epitopes               | Variants                                         | Composition <sup>1</sup> | GeneBank accession numbers <sup>2</sup>              |                                                  |                                                      |                              |
|------------------------|--------------------------------------------------|--------------------------|------------------------------------------------------|--------------------------------------------------|------------------------------------------------------|------------------------------|
| DQ2.5-glia- $\alpha$ 1 | Canonical epitope                                | NA<br>AA                 | CCA T{T/A}T CC{G/A} CAA CTA CCA TAT<br>P{F/Y}PQPQLPY | KX173976, KX174272, KX174055                     |                                                      |                              |
|                        | Mutated epitopes                                 | NA<br>AA                 | CCA TTT CCG --- CCA CAA CTA CCA TAT<br>PFP-PQLPY     | KX173988                                         |                                                      |                              |
|                        |                                                  | NA<br>AA                 | CCA TTT TCG CAG CCG CAA CTA CCA TAT<br>PFSQPQLPY     | KX173847                                         |                                                      |                              |
|                        |                                                  | NA<br>AA                 | CCA TTT CTG CAG CCG CAA CTA CCA TAT<br>PFLQPQLPY     | KX174174                                         |                                                      |                              |
|                        |                                                  | NA<br>AA                 | CCA TTT CCG CAG CCG CAA CTA TCA TAT<br>PFPQPQLSY     | KX174120                                         |                                                      |                              |
|                        |                                                  | NA<br>AA                 | CCA TAT CCG CGG CCG CAA CTA CCA TAT<br>PYPRPQLPY     | KX174253                                         |                                                      |                              |
|                        |                                                  | NA<br>AA                 | CCA TAT CCG CAG CCG CAT CTA CCA TAT<br>PYPQHLPY      | KX174252                                         |                                                      |                              |
|                        |                                                  | DQ2.5-glia- $\alpha$ 2   | Canonical epitope                                    | NA<br>AA                                         | CC{A/G} CAG CCG CAA CTA CCA TAT CCG CAG<br>PQPQLPYPQ | KX173976, KX174272, KX174055 |
|                        |                                                  |                          | Mutated epitopes                                     | NA<br>AA                                         | CCG --- CCA CAA CTA CCA TAT CCG CAG<br>P-PQLPYPQ     | KX173988                     |
| NA<br>AA               | CCG CAG CCG CAA CTA CCA TAT TCA CAG<br>PQPQLPYSQ |                          |                                                      | KX174127                                         |                                                      |                              |
| NA<br>AA               | CCG CGG CCG CAA CTA CCA TAT CCG CAG<br>PRPQLPYPQ |                          |                                                      | KX174253                                         |                                                      |                              |
| NA<br>AA               | CCG CAG CCG CAT CTA CCA TAT CCG CAG<br>PQPHLPYPQ |                          |                                                      | KX174252                                         |                                                      |                              |
| DQ2.5-glia- $\alpha$ 3 | Canonical epitope                                |                          |                                                      | NA<br>AA                                         | TTT CGA CCA CAA CAA CCA TAT CCA CA{A/G}<br>FRPQQPYPQ | KX174127                     |
|                        | Mutated epitopes                                 |                          |                                                      | NA<br>AA                                         | TTT CA CCA CAA CAA CCA TAT CCA CAA<br>FPPQQPYPQ      | KX173988                     |
|                        |                                                  |                          | NA<br>AA                                             | TTT CGA CAA CAA CAA CCA TAT CCA CAA<br>FRQQQPYPQ | KX173847                                             |                              |
|                        |                                                  |                          | NA<br>AA                                             | TTT CGA CCA CAA CAA TCA TAT CCA CAA<br>FRPQQSYQP | KX174255                                             |                              |
|                        |                                                  | NA<br>AA                 | TTT CGA CCA CAA AAA CCA TAT CCA CAA<br>FRPQKPYPQ     | KX173906                                         |                                                      |                              |
|                        |                                                  | NA<br>AA                 | TTT CAA CCA CAA CAA CCA TAT CCA CAA<br>FQPQQPYPQ     | KX174012                                         |                                                      |                              |
|                        |                                                  | DQ8-glia- $\alpha$ 1     | Canonical epitope                                    | NA<br>AA                                         | CAG GGC TCC TTC CAG CCA TCT CAG CAA<br>QGSFQPSQQ     | KX174252                     |
|                        |                                                  |                          | Mutated epitopes                                     | NA<br>AA                                         | CAG GGC TCC TTC CGG CCA TCT CAG CAA<br>QGSFRPSQQ     | KX173906                     |
|                        |                                                  |                          |                                                      | NA<br>AA                                         | CAG GGC TCC TTC CAG TCA TCT CAG CAA<br>QGSFQSSQQ     | KX173989                     |
| NA<br>AA               | CAG GGC TTC TTC CAG CCA TCT CAG CAA<br>QGFQPSQQ  |                          |                                                      | KX173976                                         |                                                      |                              |
| NA<br>AA               | CAG GTC TCC TTC CAG CCA TCT CAG CTA<br>QVSFQPSQL |                          |                                                      | KX173988                                         |                                                      |                              |

<sup>1</sup> : NA : Nucleic acid composition ; AA : Amino acid composition

<sup>2</sup> :  $\alpha$ -gliadin sequences previously cloned in Dubois et al. 2016
