# Supplementary material for: Development of TaqMan probes targeting the four major celiac disease epitopes found in α-gliadin sequences of spelt (Triticum aestivum ssp. spelta) and bread wheat (Triticum aestivum ssp. aestivum)
Source: PubMed Central journal article supplement (PMC5588674; doi:10.1186/s13007-017-0222-2), 2017-09-06
Supplement: 13007_2017_222_MOESM3_ESM.pdf [file 13007_2017_222_MOESM3_ESM.pdf]

**Additional file 3. Primer efficiency calculation for the four T-cell stimulatory epitopes involved in CD and for the four reference genes used to normalize the epitope expression levels.**

|                              | Targeted sequence | Slope  | R <sup>2</sup> | Efficiency (%) |
|------------------------------|-------------------|--------|----------------|----------------|
| Epitopes                     | DQ2.5-glia-α1     | -3.382 | 0.999          | 97.5           |
|                              | DQ2.5-glia-α2     | -3.350 | 0.999          | 98.8           |
|                              | DQ2.5-glia-α3     | -3.333 | 0.999          | 99.5           |
|                              | DQ8-glia-α1       | -3.412 | 0.997          | 96.4           |
| Reference genes <sup>1</sup> | ARF               | -3.344 | 0.994          | 99.1           |
|                              | RLI               | -3.395 | 0.998          | 97.0           |
|                              | VAS               | -3.322 | 0.998          | 100.0          |
|                              | DUF52             | -3.347 | 0.994          | 99.0           |

**Probes targeting canonical epitopes:**

**1. DQ2.5-glia-α1**

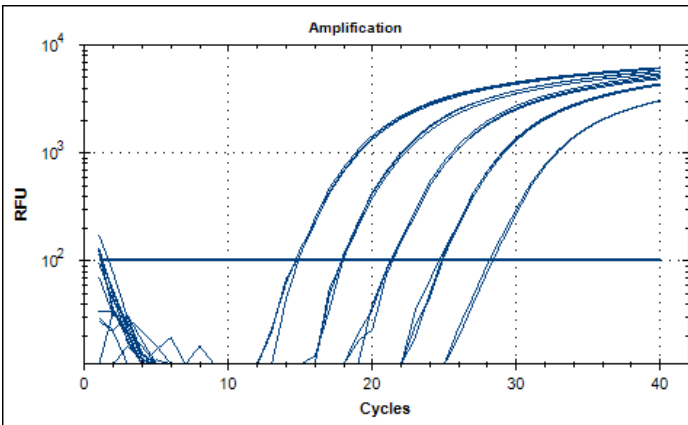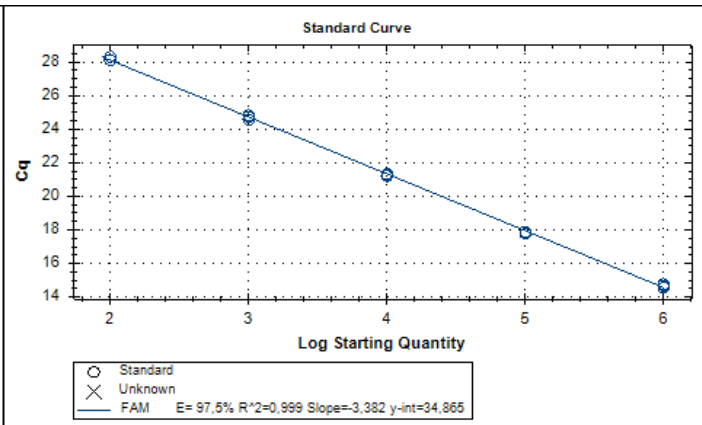

## 2. DQ2.5-glia- $\alpha$ 2

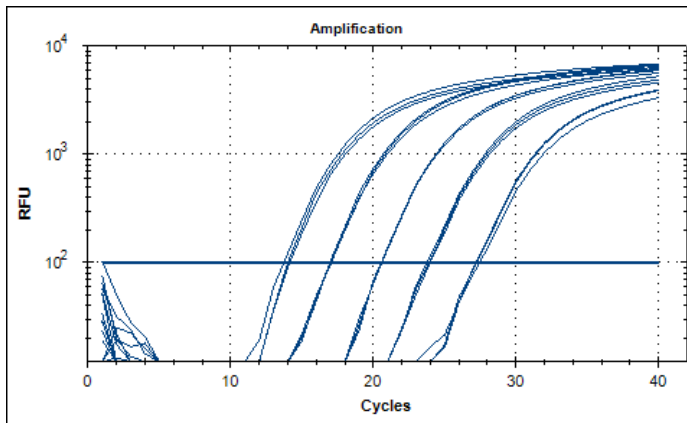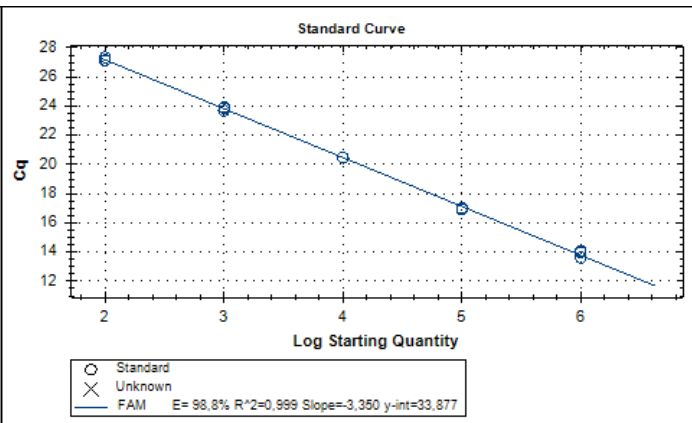

## 3. DQ2.5-glia- $\alpha$ 3

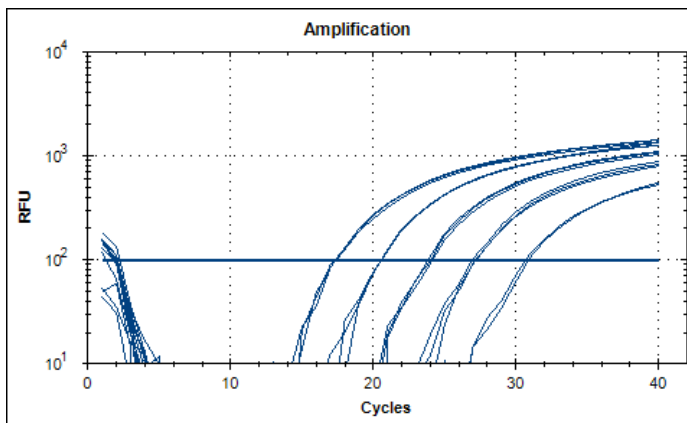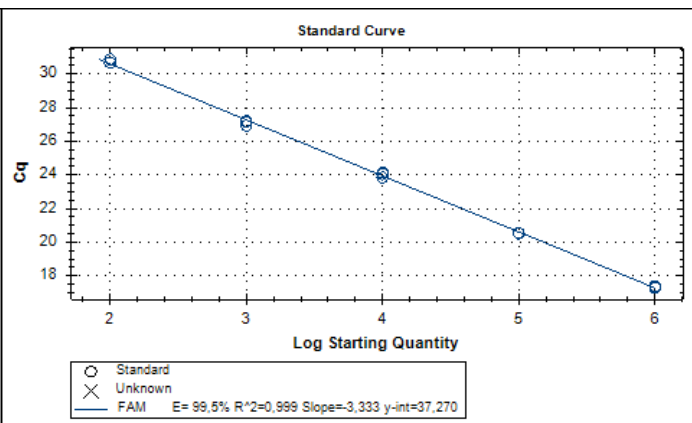

## 4. DQ8-glia- $\alpha$ 1

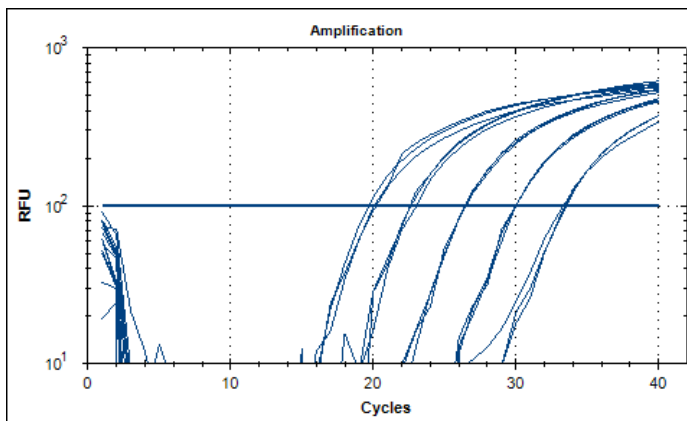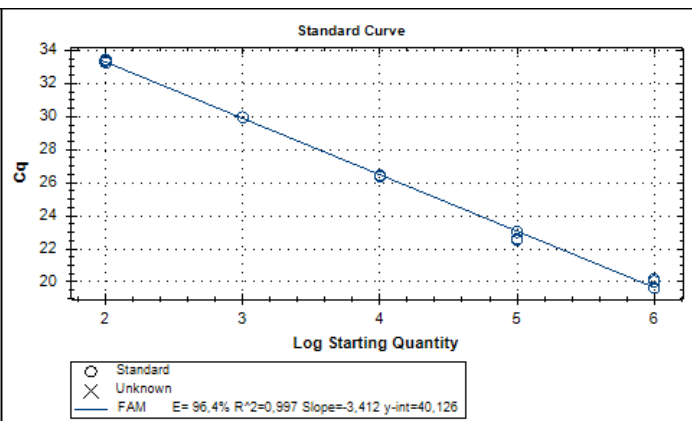

## Probes targeting reference genes:

### 5. ARF

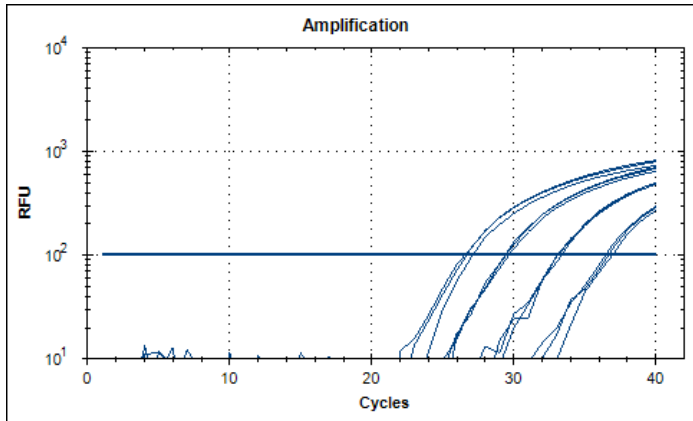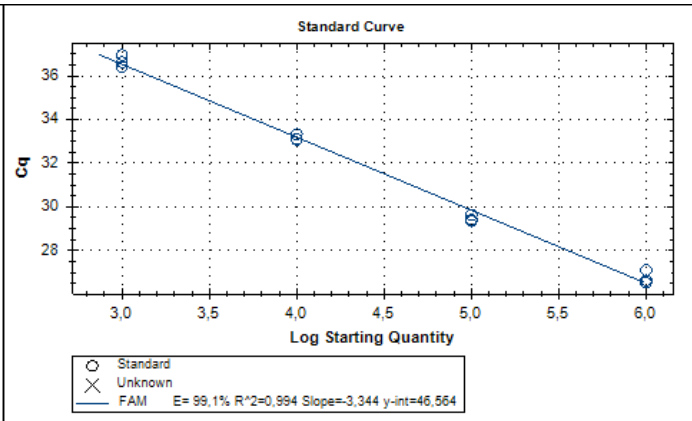

### 6. RLI

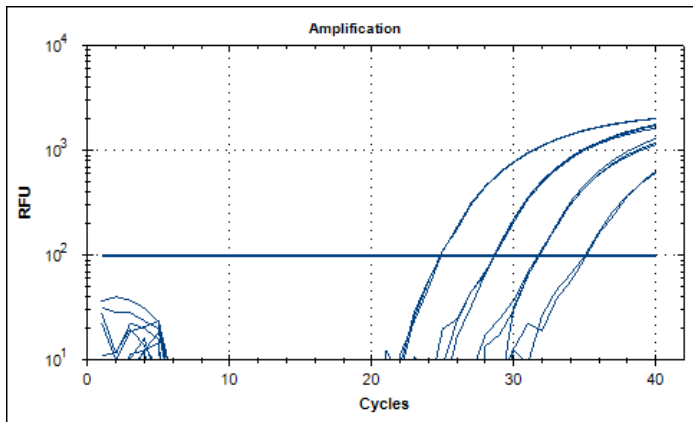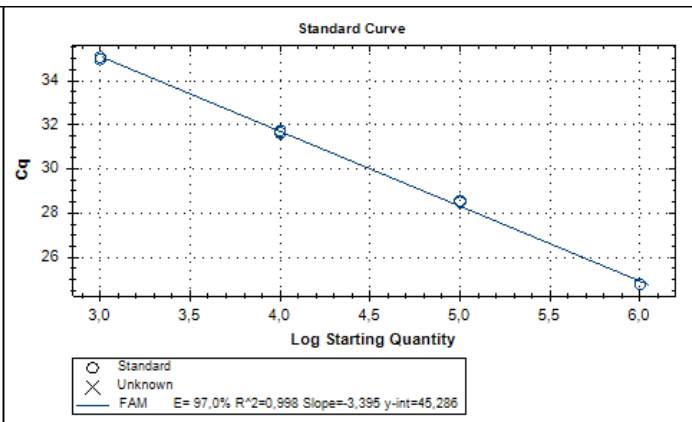

### 7. VAS

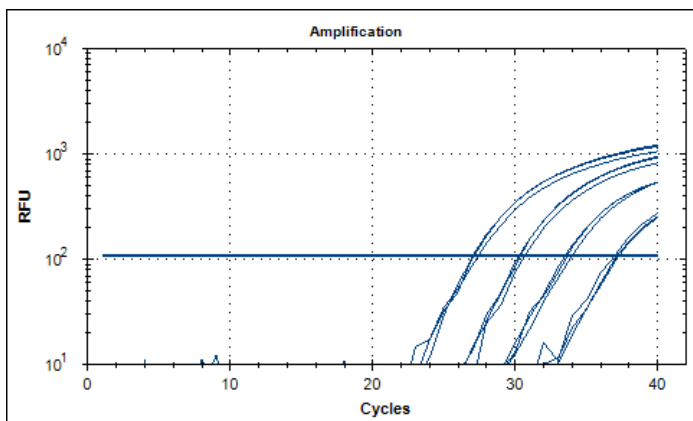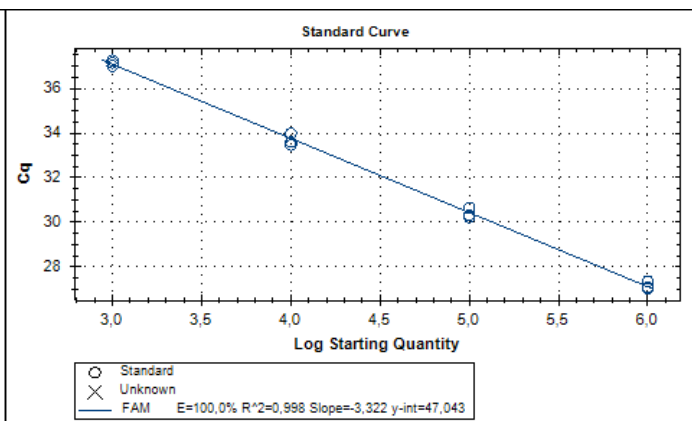

## 8. DUF52

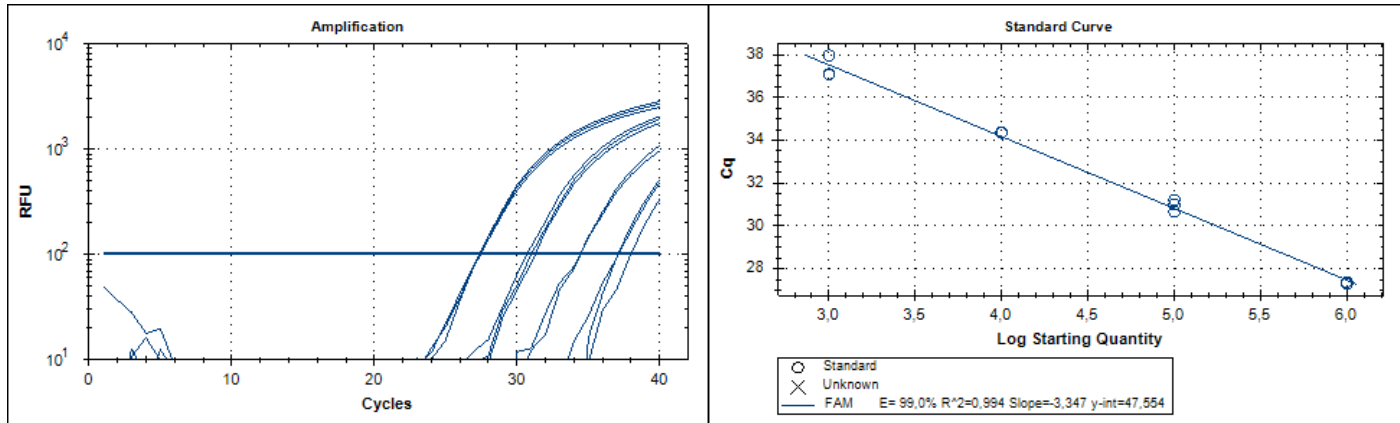

Each set of primers was validated for its efficiency by carrying out qPCR amplifications with successive 10-fold cDNA dilutions. Calibration curves were drawn by plotting the logarithm of the cDNA concentration on the x-axis and the corresponding C<sub>t</sub> values on the y-axis. The efficiency was then calculated based on the curve slope: Efficiency (%) =  $[(10^{-1/\text{slope}})-1] * 100$ .

<sup>1</sup> : ARF: ADP-ribosylation factor, RLI: Similar to RNase L inhibitor-like protein, VAS: Vacuolar ATP synthase 16 kDa proteolipid sub., DUF52: Protein of unknown function [DUF52 family].
