# Supplementary material for: Development of TaqMan probes targeting the four major celiac disease epitopes found in α-gliadin sequences of spelt (Triticum aestivum ssp. spelta) and bread wheat (Triticum aestivum ssp. aestivum)
Source: PubMed Central journal article supplement (PMC5588674; doi:10.1186/s13007-017-0222-2), 2017-09-06
Supplement: 13007_2017_222_MOESM4_ESM.pdf [file 13007_2017_222_MOESM4_ESM.pdf]

**Additional file 4. Agarose gel electrophoresis of the qPCR products amplified with primers targeting the four most stable reference genes ARF, RLI, VAS and DUF52.**

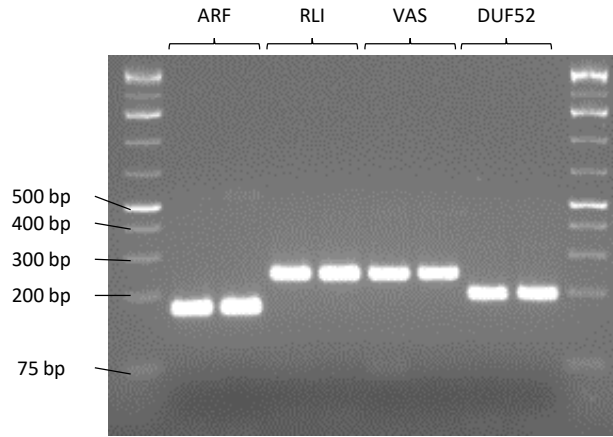

ARF: ADP-ribosylation factor, RLI: Similar to RNase L inhibitor-like protein, VAS: Vacuolar ATP synthase 16 kDa proteolipid sub., DUF52: Protein of unknown function [DUF52 family].
