# Supplementary material for: Development of TaqMan probes targeting the four major celiac disease epitopes found in α-gliadin sequences of spelt (Triticum aestivum ssp. spelta) and bread wheat (Triticum aestivum ssp. aestivum)
Source: PubMed Central journal article supplement (PMC5588674; doi:10.1186/s13007-017-0222-2), 2017-09-06
Supplement: 13007_2017_222_MOESM5_ESM.pdf [file 13007_2017_222_MOESM5_ESM.pdf]

**Additional file 5. Average Ct values measured for the four T-cell stimulatory epitopes involved in CD and for the four most stable references genes in 11 spelt accessions and 3 diploid accessions representative of the ancestral genomes of spelt and bread wheat.**

| Species                              | Accession name | TaqMan probes targeting epitopes |       |       |       | TaqMan probes targeting reference genes |       |       |       |
|--------------------------------------|----------------|----------------------------------|-------|-------|-------|-----------------------------------------|-------|-------|-------|
|                                      |                | A20                              | A1    | A9    | A2    | ARF                                     | RLI   | VAS   | DUF52 |
| <i>Triticum aestivum ssp. spelta</i> | BEL08          | 19.62                            | 21.90 | 16.59 | 15.15 | 27.64                                   | 29.92 | 32.03 | 29.36 |
|                                      | DK01           | 18.88                            | 21.80 | 16.44 | 15.37 | 26.70                                   | 29.55 | 31.49 | 28.60 |
|                                      | SPA03          | 18.30                            | 20.47 | 15.80 | 14.68 | 28.01                                   | 29.89 | 31.32 | 30.16 |
|                                      | BUL04          | 21.05                            | 24.14 | 18.76 | 17.99 | 29.27                                   | 32.54 | 34.32 | 31.36 |
|                                      | GER11          | 18.83                            | 20.75 | 16.43 | 15.18 | 27.06                                   | 30.39 | 32.49 | 29.52 |
|                                      | GER12          | 19.60                            | 21.19 | 17.08 | 15.91 | 27.82                                   | 30.34 | 31.96 | 29.61 |
|                                      | TAD06          | 19.85                            | 22.67 | 17.77 | 16.16 | 27.27                                   | 29.68 | 31.10 | 28.86 |
|                                      | SWI23          | 18.68                            | 21.23 | 16.58 | 15.32 | 27.25                                   | 29.76 | 31.66 | 28.94 |
|                                      | US06           | 19.74                            | 18.91 | 17.37 | 15.91 | 29.00                                   | 31.58 | 33.21 | 30.77 |
|                                      | Iran77d        | 21.03                            | 22.79 | 18.72 | 17.11 | 28.59                                   | 30.66 | 32.02 | 30.19 |
| IRA03                                | 19.19          | 21.28                            | 17.03 | 15.38 | 27.36 | 30.14                                   | 31.58 | 29.03 |       |
| <i>Triticum urartu</i>               | LB01           | 19.97                            | 35.08 | 18.83 |       | 27.90                                   | 32.00 | 33.58 | 29.35 |
| <i>Aegilops speltoides</i>           | TR08           |                                  | 22.09 |       |       | 28.07                                   | 31.41 | 34.68 | 31.83 |
| <i>Aegilops tauschii</i>             | TR10           | 22.61                            | 24.97 | 20.53 | 19.40 | 29.73                                   | 33.45 | 34.75 | 31.25 |
